# Supplementary material for: A green high-initiation-power primary explosive: synthesis, 3D structure and energetic properties of dipotassium 3,4-bis(3-dinitromethylfurazan-4-oxy)furazan
Source: Royal Society of Chemistry journal article supplement (doi:10.1039/c5ra09822j), 2015-01-01
Supplement: c5ra09822j1.pdf [file c5ra09822j1.pdf]

## Supporting Information

### A “Green” High-initiation-power Primary Explosive: Synthesis, 3D Structure and Energetic Properties of Potassium 3,4-Bis(3-dinitromethylfuran-4- oxy)furan

Lianjie Zhai,<sup>a</sup> Xuezhong Fan,<sup>\*a</sup> Bozhou Wang,<sup>a</sup> Fuqiang Bi,<sup>a</sup>

Yanan Li <sup>a,b</sup> and Yanlong Zhu<sup>a</sup>

<sup>a</sup> Xi'an Modern Chemistry Research Institute, Xi'an 710069, P. R. China. E-mail: xuezhongfan@126.com; Fax: +86-029-88291306; Tel: +86-029-88291306

<sup>b</sup> School of Chemical Engineering and the Environment, Beijing Institute of Technology, Beijing 100081, P. R. China

\*Corresponding author

Prof. Xuezhong Chen

Tel.: +86-029-88291306

Fax: +86-029-88291306

E-mail: xuezhongfan@126.com

## Table of Contents

### 1 X-ray crystallography

### 2 <sup>1</sup>H and <sup>13</sup>C NMR spectra

### 1 X-ray crystallography

Band angles and dihedral of the data collection and refinement are given in Table S1.

Table S1. Selected bond lengths and bond angles for the compound K<sub>2</sub>BDFOF

|             |            |                    |           |
|-------------|------------|--------------------|-----------|
| K(1)-O(1)   | 2.695(2)   | O(1)-K(1)-O(2)#1   | 132.10(7) |
| K(1)-O(2)#1 | 2.711(2)   | O(1)-K(1)-O(1)#2   | 87.87(6)  |
| K(1)-O(1)#2 | 2.812(2)   | O(2)#1-K(1)-O(1)#2 | 135.15(6) |
| K(1)-O(3)   | 2.867(2)   | O(1)-K(1)-O(3)     | 55.19(5)  |
| K(1)-O(3)#3 | 2.8944(19) | O(2)#1-K(1)-O(3)   | 87.55(6)  |
| K(1)-O(4)#3 | 2.963(2)   | O(1)#2-K(1)-O(3)   | 137.23(6) |
| K(1)-O(4)#4 | 3.021(2)   | O(1)-K(1)-O(3)#3   | 110.87(6) |
| K(1)-N(3)#4 | 3.059(2)   | O(2)#1-K(1)-O(3)#3 | 69.31(6)  |
| K(1)-N(3)#5 | 3.235(3)   | O(1)#2-K(1)-O(3)#3 | 120.72(6) |
| K(1)-N(1)#3 | 3.275(2)   | O(3)-K(1)-O(3)#3   | 64.74(6)  |
| N(1)-O(4)   | 1.241(3)   | O(1)-K(1)-O(4)#3   | 144.26(6) |
| N(1)-O(3)   | 1.247(3)   | O(2)#1-K(1)-O(4)#3 | 69.62(6)  |
| N(1)-C(1)   | 1.390(3)   | O(1)#2-K(1)-O(4)#3 | 89.28(6)  |
| N(2)-O(1)   | 1.239(3)   | O(3)-K(1)-O(4)#3   | 107.99(5) |
| N(2)-O(2)   | 1.253(2)   | O(3)#3-K(1)-O(4)#3 | 43.24(5)  |
| N(2)-C(1)   | 1.379(3)   | O(1)-K(1)-O(4)#4   | 119.00(6) |
| N(3)-C(2)   | 1.300(3)   | O(2)#1-K(1)-O(4)#4 | 66.79(6)  |
| N(3)-O(5)   | 1.391(3)   | O(1)#2-K(1)-O(4)#4 | 76.62(6)  |
| N(3)-K(1)#6 | 3.059(2)   | O(3)-K(1)-O(4)#4   | 137.25(6) |
| N(4)-C(3)   | 1.284(3)   | O(3)#3-K(1)-O(4)#4 | 127.90(6) |
| N(4)-O(5)   | 1.373(3)   | O(4)#3-K(1)-O(4)#4 | 94.82(6)  |
| N(5)-C(4)   | 1.290(4)   | O(1)-K(1)-N(3)#4   | 65.67(6)  |
| N(5)-O(7)   | 1.390(3)   | O(2)#1-K(1)-N(3)#4 | 110.44(7) |
| O(1)-K(1)#2 | 2.812(2)   | O(1)#2-K(1)-N(3)#4 | 62.92(6)  |
| O(2)-K(1)#7 | 2.711(2)   | O(3)-K(1)-N(3)#4   | 110.70(6) |
| O(2)-K(1)#2 | 3.421(2)   | O(3)#3-K(1)-N(3)#4 | 175.38(6) |
| O(6)-C(4)   | 1.348(3)   | O(4)#3-K(1)-N(3)#4 | 141.29(6) |
| O(6)-C(3)   | 1.368(3)   | O(4)#4-K(1)-N(3)#4 | 54.63(6)  |
| O(7)-N(5)#8 | 1.390(3)   | O(1)-K(1)-N(3)#5   | 61.60(6)  |
| C(1)-C(2)   | 1.457(3)   | O(2)#1-K(1)-N(3)#5 | 147.62(6) |
| C(2)-C(3)   | 1.421(3)   | O(1)#2-K(1)-N(3)#5 | 61.98(6)  |
| C(4)-C(4)#8 | 1.415(5)   | O(3)-K(1)-N(3)#5   | 80.12(6)  |

Symmetry transformations used to generate equivalent atoms: #1 x,y+1,z; #2 -x+2,-y+2,-z+1; #3 -x+3/2,-y+5/2,-z+1;

#4 x+1/2,y+1/2,z; #5 -x+3/2,-y+3/2,-z+1; #6 x-1/2,y-1/2,z; #7 x,y-1,z; #8 -x+2,y,-z+3/2.

## 2 $^1\text{H}$ and $^{13}\text{C}$ NMR spectra

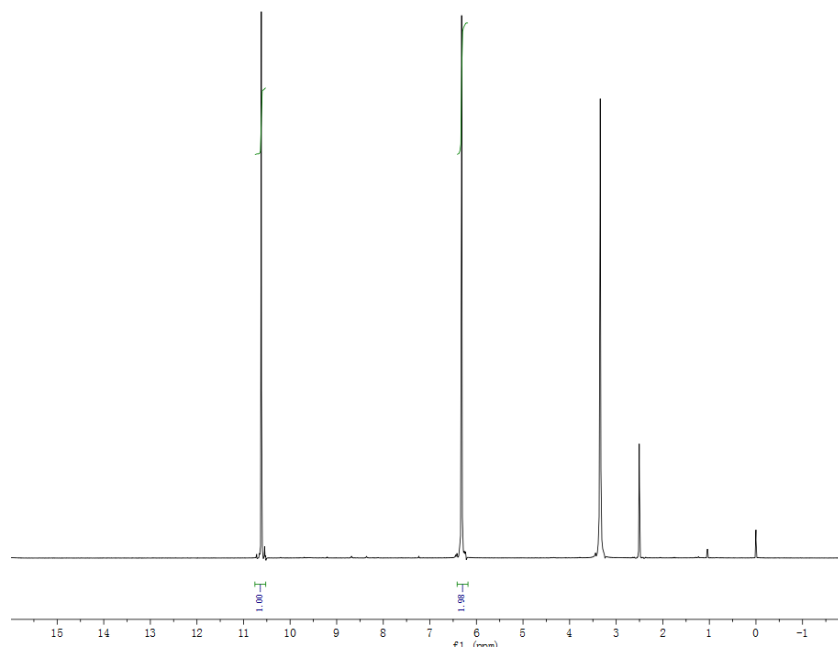

Fig. S1  $^1\text{H}$  NMR spectrum of **2** in DMSO- $d_6$

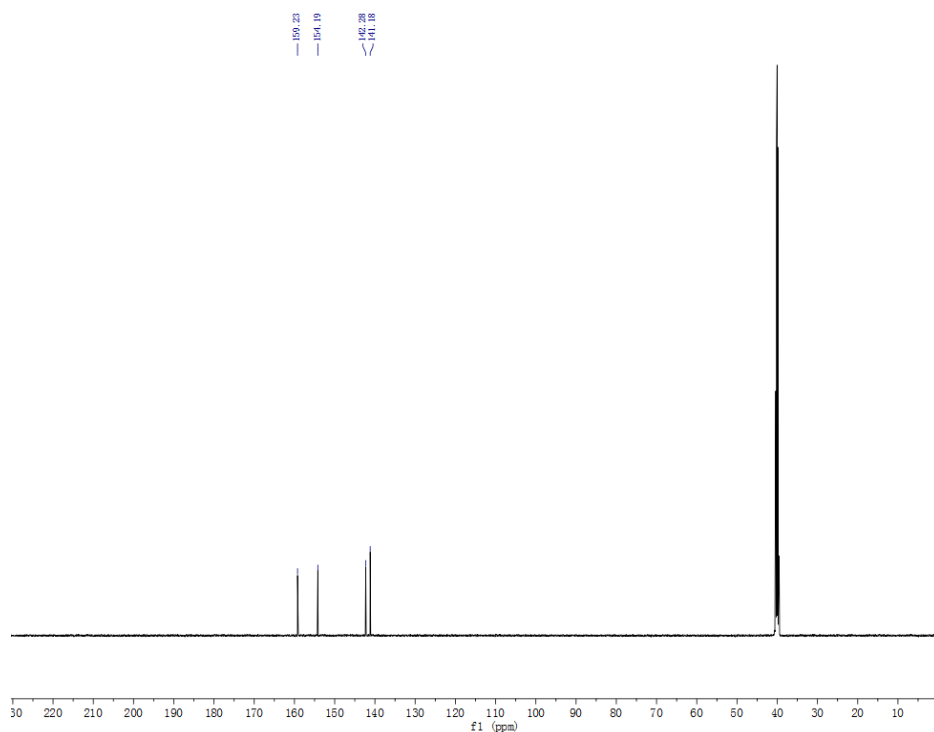

Fig. S2  $^{13}\text{C}$  NMR spectrum of **2** in DMSO- $d_6$

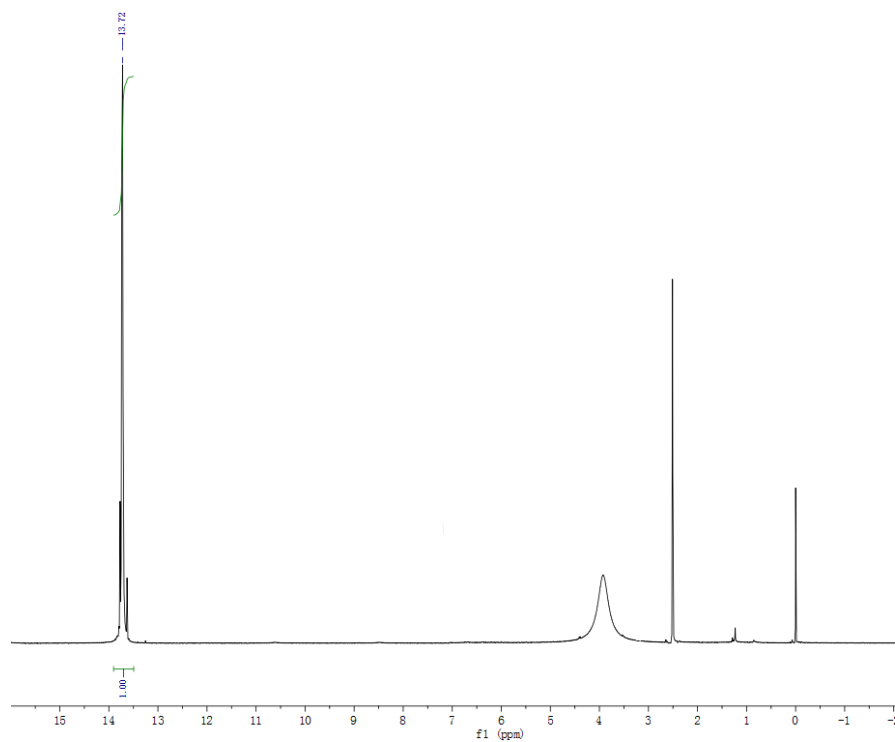

Fig. S3  $^1\text{H}$  NMR spectrum of **3** in DMSO- $d_6$

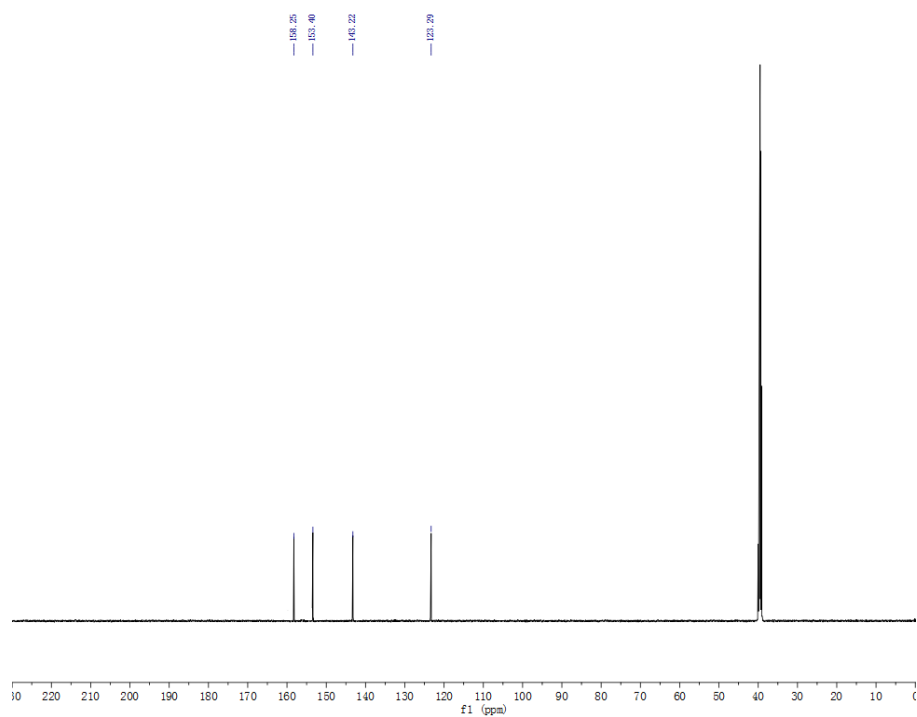

Fig. S4  $^{13}\text{C}$  NMR spectrum of **3** in DMSO- $d_6$

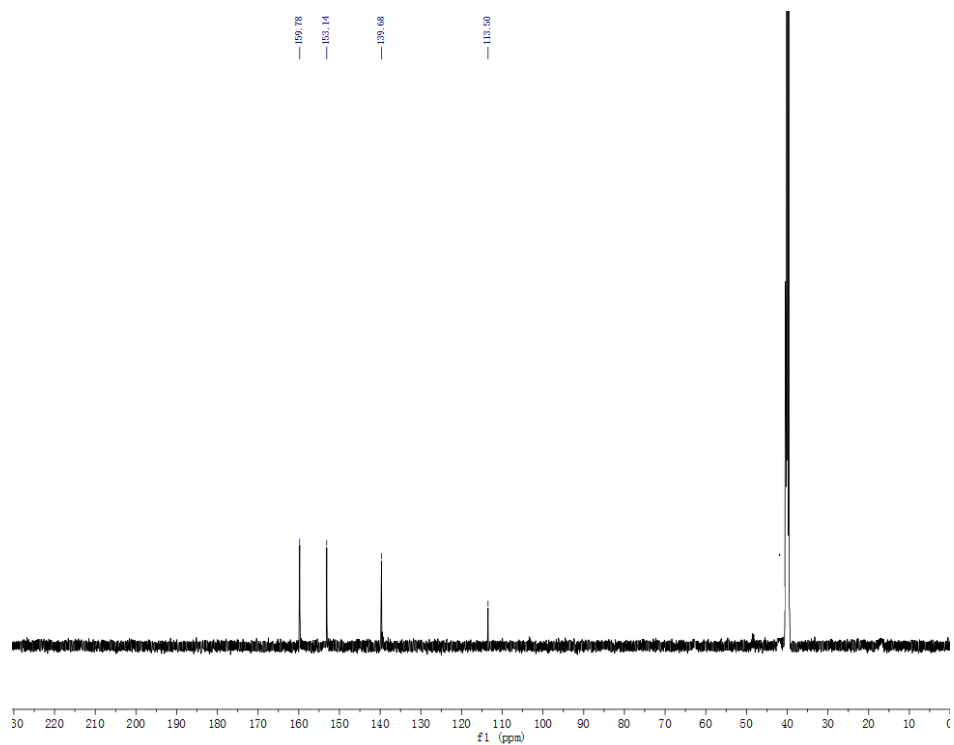

Fig. S5  $^{13}\text{C}$  NMR spectrum of 4 in DMSO-*d*<sub>6</sub>

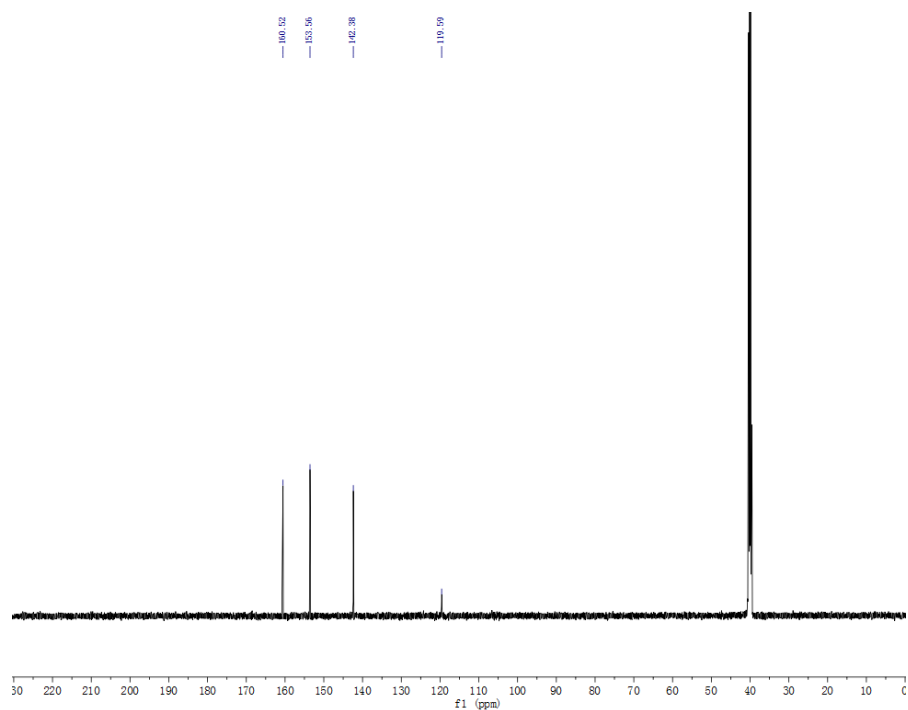

Fig. S6  $^{13}\text{C}$  NMR spectrum of  $\text{K}_2\text{BDFOF}$  in DMSO-*d*<sub>6</sub>
